# Supplementary material for: 3-D streamline steering by nodes arrayed in an entangled microfluidic network
Source: Royal Society of Chemistry journal article supplement (doi:10.1039/b709216d), 2007-01-01
Supplement: b709216d.pdf [file b709216d.pdf]

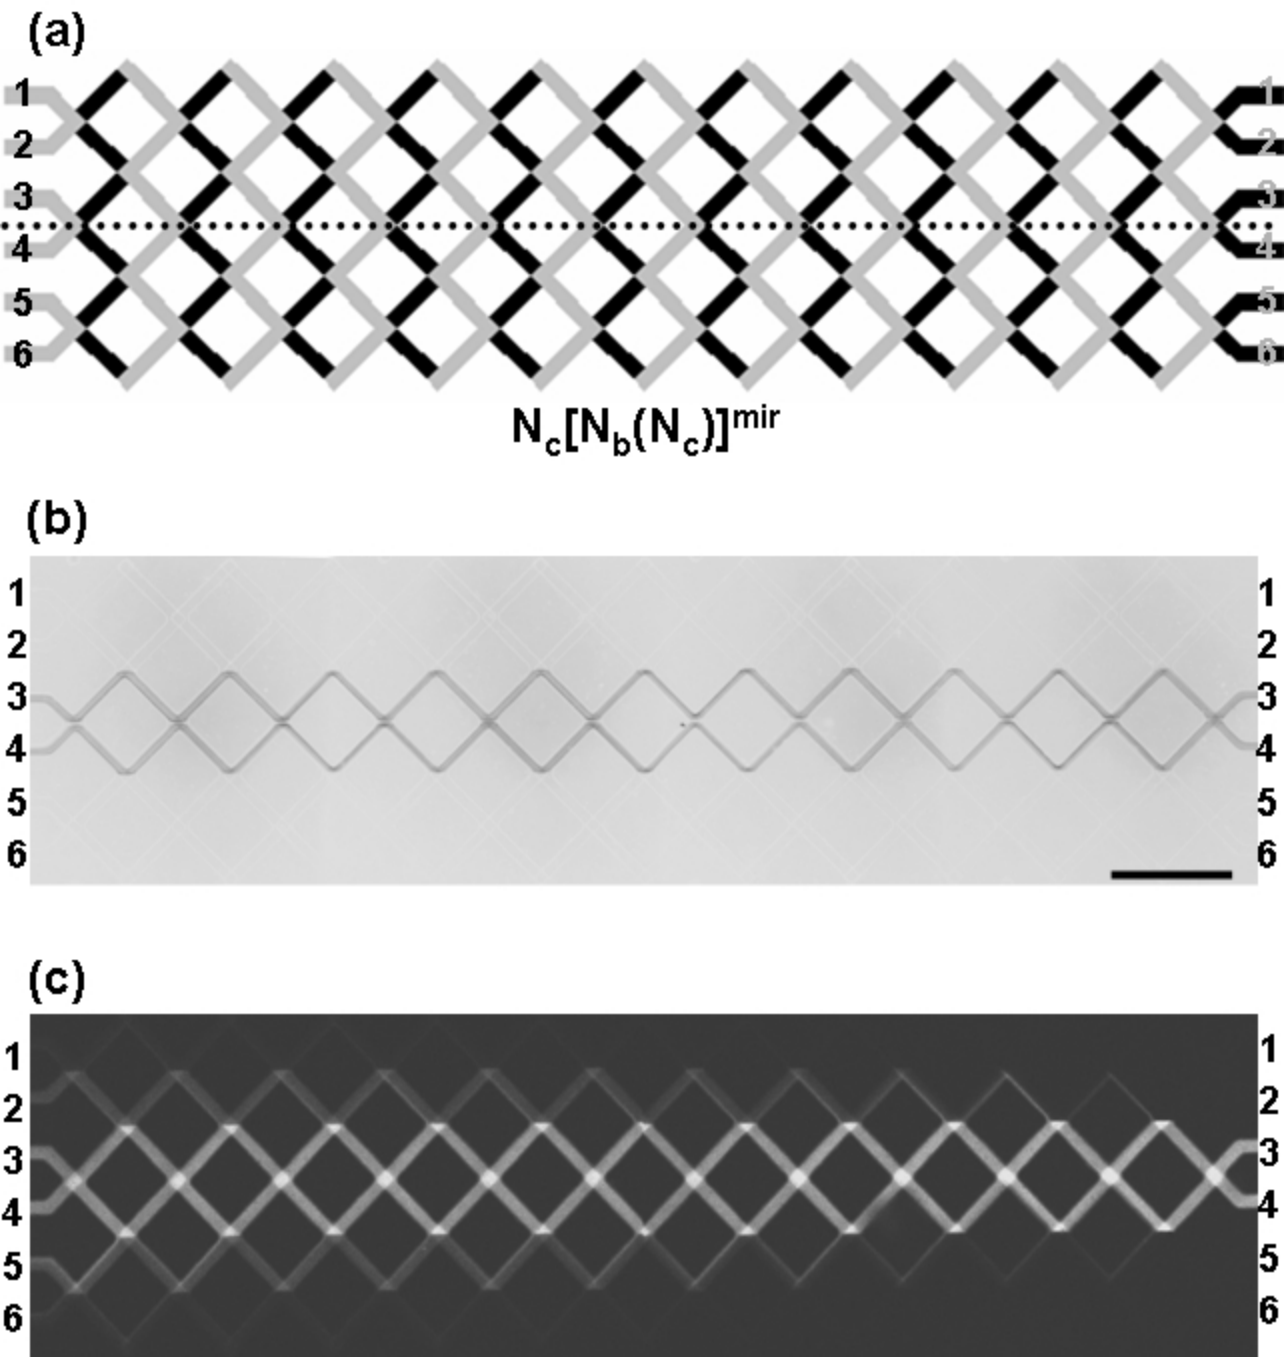

**Fig. S1** (a) The schematic of node array configuration for  $N_c[N_b(N_c)]^{mir}$  entangled network where gray and black color represented two distinguishable microchannel layers that were stacked face-to-face. (b) Fluorescence micrograph of bead trajectories. Beads were confined to travel along the imaginary lanes 3 and 4. This was due to the property of  $N$  nodes that resembled to its topological 2-D equivalence. (c) Fluorescence micrograph of R110 dye gradient image in this network. In the absence of convective transport, dye molecules could only travel across parallel lanes by diffusion. Scale bar is  $500\mu\text{m}$ .
